# Supplementary figures and images for: Nanocrystalline FeOClx grafted MCM-41 as active mesoporous catalyst for the solvent-free multi-condensation reaction
Source: Royal Society of Chemistry journal article supplement (doi:10.1039/c6ra14736d), 2016-01-01

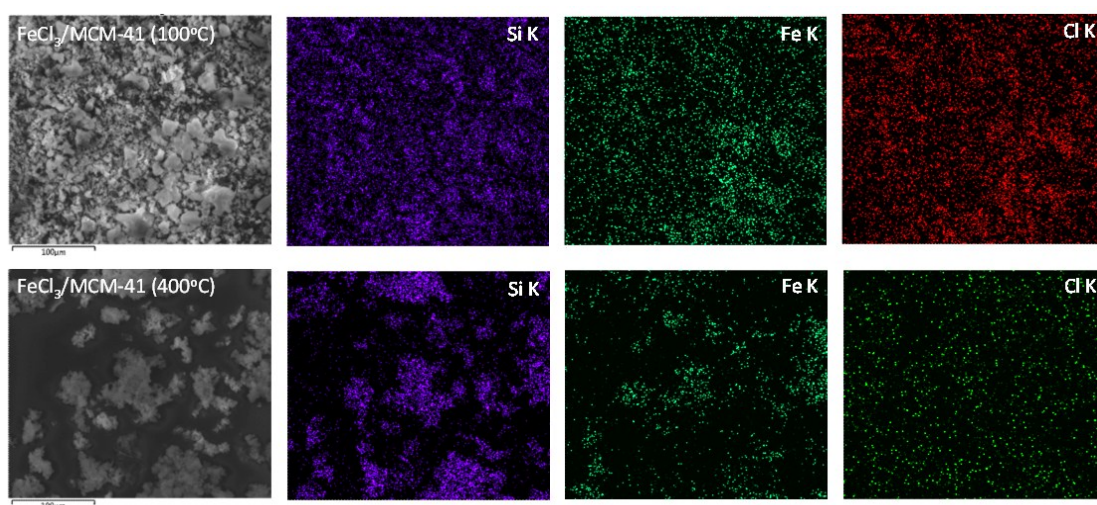

**Figure S1:** SEM-EDX Mapping of FeCl<sub>3</sub>/MCM-41 dried at 100 °C (upper panel) and calcined at 400 °C (lower panel)

Supplement: c6ra14736d1.pdf [file c6ra14736d1.pdf]
